# Supplementary material for: Self-Folding of Naked Segment 8 Genomic RNA of Influenza A Virus
Source: PubMed Central journal article supplement (PMC4743857; doi:10.1371/journal.pone.0148281), 2016-02-05
Supplement: pone.0148281.s003.pdf [file pone.0148281.s003.pdf]

## S1 File. Supporting Information Tables.

**Table A. Primers for polymerase chain reaction using to obtain DNA template for vRNA8 and mini-vRNA8.**

| Name | Length (nt) | Sequence 5'→3' <sup>a</sup>                                  |
|------|-------------|--------------------------------------------------------------|
| Rev  | 30          | AGCAAAAGCAGGGTGACAAAAACATAATGG                               |
| For  | 61          | AAAAATAATACGACTCACTATAGGGAGTAGAAACAAGGGTGTTTTTATCATTAAATAAGC |

<sup>a</sup>The underlined nucleotides residues are the polymerase T7 promoter.

**Table B. Primers for polymerase chain reaction using to obtain mini-vRNA8.**

|   | Length (nt) | Sequence 5'→3' <sup>a</sup>         |
|---|-------------|-------------------------------------|
| 1 | 36          | AAGAATTCAGTAGAAACAAGGGTGTTTTTATCATT |
| 2 | 33          | AAGGATCCAGAAAGTTTGAAGAAATAAGGTGGC   |
| 3 | 30          | AAGGATCCGATGTCCAGACCAAGAGTGTTG      |
| 4 | 25          | AACTGCAGAGCAAAAGCAGGGTGAC           |

<sup>a</sup>The underlined nucleotides residues are restriction sites: 1 - EcoR1, 2, 3 - BamH1, 4 - Pst1.

**Table C. Primers for reverse transcription.**

| Name | Length (nt) | Complementary region in segment 8 RNA | Sequence 5'→3' <sup>a</sup> |
|------|-------------|---------------------------------------|-----------------------------|
| Pr1  | 23          | 847-869                               | AGCaGGgTGaCAAAaACaTAATG     |
| Pr2  | 22          | 719-740                               | GCCgAGaTCaGAAgTCCCTaAG      |
| Pr3  | 23          | 572-591                               | CTGACATGACTCTCGAAGAAATG     |
| Pr4  | 26          | 287-312                               | CTTGAATGGAATGATAACACAGTTCG  |
| Pr5  | 22          | 429-450                               | GACCGGTTGGAAACCCTAATAC      |
| Pr6  | 22          | 142-163                               | GGTGGCTGATTGAAGAAGTAAG      |

<sup>a</sup> DNA primers 1-6 were used to vRNA8; primers 1, 2, 6 to mini-vRNA8; in small letter (a, g) - LNA nucleotides. Each primer was labeled with 6-FAM at 5' end.

**Table D. Heptamer probes complementary to vRNA8.**

| Complementary binding sites | Sequence and modifications of probes <sup>a</sup><br>5'→3' |
|-----------------------------|------------------------------------------------------------|
| 7                           | UgUuUcUPy                                                  |
| 30                          | UdUuUdAPy                                                  |
| 126                         | AdUuAcAPy                                                  |
| 174                         | GuUuGdAPy                                                  |
| 424                         | AcUuAgAPy                                                  |
| 430                         | AdUdCuAPy                                                  |
| 454                         | GdUuUuUPy                                                  |
| 476                         | UdUuGdAPy                                                  |
| 618                         | CuUdAdAPy                                                  |
| 806                         | UuCuUuGPy                                                  |
|                             |                                                            |

<sup>a</sup> nucleotides in capital letter (A, C, G, U, D) are 2'-O-methyl-RNA nucleotides, in small letter (a, c, g, u, d) - LNA nucleotides; D and d - 2,6 -diaminopurine (2'-O-methyl type or LNA, respectively). Py – pyrene (56-57).

**Table E. RNase H cleavage of vRNA8 in the presence of selected DNA oligonucleotides.**

| Binding sites for vRNA8 | Sequence of DNA oligonucleotide <sup>a</sup> | Predicted $\Delta G^{\circ}_{37}$ for DNA/RNA duplex <sup>b</sup> (kcal/mol) | Predicted $\Delta G^{\circ}_{37}$ of duplex calculated as RNA/RNA <sup>c</sup> (kcal/mol) | Predicted $\Delta G^{\circ}_{37}$ of mismatched duplex calculated as RNA/RNA <sup>c</sup> (kcal/mol)     | RNase H cleavage site <sup>d</sup>                      |
|-------------------------|----------------------------------------------|------------------------------------------------------------------------------|-------------------------------------------------------------------------------------------|----------------------------------------------------------------------------------------------------------|---------------------------------------------------------|
| 68 (534)                | AAGTGG                                       | -3.44                                                                        | -6.3 (534)<br>-6.2 (68)                                                                   |                                                                                                          | 70 (s)<br>535 (s)                                       |
| 194 (254, 390)          | GAGAAG                                       | -2.20                                                                        | -5.7 (194)<br>-5.0 (390)<br>-5.0 (254)                                                    | -4.8 (148/149)<br>-4.6 (729)<br>-4.6 (179)<br>-4.6 (407/408)<br>-4.3 (57/58)<br>-4.3 266/267             | 248-254 (s)<br>388 (w)<br>392 (s)<br>407 (s)<br>410 (s) |
| 17 (118, 251, 684, 854) | AAACAG                                       | -1.47                                                                        | -4.2 (251)<br>-3.9 (684)<br>-3.9 (118)<br>-1.8 (17)<br>-1.8 (854)                         | -3.5 (107)                                                                                               | 18-19 (w)<br>117 (s)<br>249 (s)                         |
| 108 (192)               | GAACAG                                       | -2.63                                                                        | -7.4 (108)<br>-5.2 (192)                                                                  | -4.6 (250/251)<br>-4.3 (683/684)<br>-4.3 (117/118)                                                       | 249-250 (s)                                             |
| 143                     | AGTAAGACA                                    | -6.43                                                                        | -10.6                                                                                     | -6.1 (61/62)<br>-6.1 (781/782)<br>-5.9 (707)<br>-5.5 (488)<br>-5.4 (91)<br>-5.4 (816/817)                | 143-145 (s)                                             |
| 163                     | ATAAGGTGG                                    | -7.10                                                                        | -12.0                                                                                     | -7.3 (818)<br>-7.3 (534)<br>-7.0 (626)<br>-6.5 (67/68)<br>-6.3 (197/198)<br>-6.3 (352)<br>-6.0 (766/767) | 165-166 (s)                                             |

|     |           |       |       |                                                                                     |                                                    |
|-----|-----------|-------|-------|-------------------------------------------------------------------------------------|----------------------------------------------------|
| 170 | TGAAGAAAT | -3.83 | -8.7  | -8.1 (575)<br>-7.5 (150)<br>-6.3 (408/409)<br>-5.0 (714)<br>-4.8 (70)<br>-4.5 (253) | 172 (s)<br>251 (s)<br>253 (s)<br>149 (w)<br>73 (w) |
| 408 | AGAAGAAGG | -5.72 | -12.4 | -10 (149)<br>-7.2 (170)<br>-7.2 (576)<br>-6.9 (713)                                 | 411-415 (s)                                        |
| 436 | AAACCCTAA | -7.25 | -10.2 | -7.9 (13)<br>-7.5 (722/723)<br>-7.0 (759)<br>-6.3 (221/222)<br>-6.2 (522/523)       | 438 (w)<br>221-223 (w)<br>522-523 (w)<br>724 (w)   |
| 535 | AGAAAGTGG | -6.36 | -12.3 | -8.5 (657)<br>-7.6 (664/665)<br>-7.5 (68)<br>-6.7 (472)                             | 535-536 (s)                                        |
| 576 | CGAAGAAAT | -4.43 | -9.9  | -8.0 (169/170)<br>-6.8 (149/150)<br>-6.5 (408/409)<br>-5.3 (714)                    | 578 (w)<br>172 (w)                                 |
| 721 | CCCTAAGAG | -8.78 | -14.8 | -7.8 425                                                                            |                                                    |
| 729 | TCAGAAGTC | -7.65 | -12.6 | -10.3 (179/180)<br>-6.9 (410/411)<br>-6.6 (211)                                     | 730 (w)<br>182 (w)                                 |

*a* – Sequences of DNA 6-mers were the same as probe for certain site, sequences of DNA 9-mer were specific for designated site; *b* - calculated for DNA/RNA duplex in 300 mM NaCl, as in experiment (<http://ozone3.chem.wayne.edu>); *c* - calculated in RNAstructure5.3 program as RNA/RNA duplex for standard condition (1 M NaCl) to show the difference in  $\Delta G^{\circ}_{37}$  between complementary and predicted mismatched duplexes, in parenthesis - site of possible DNA oligonucleotide binding, denoted by the middle nucleotide of the complementary RNA region (or two nucleotides for duplex with an even number of nucleotides); *d* – nucleotides preceding RNase H cleavage site; s-strong cut, w-weak cut.

**Table F. Isoenergetic microarrays probes that bind strongly and moderately to vRNA8 and mini-vRNA8 and their thermodynamic properties<sup>a</sup>.**

| Probe name <sup>b</sup> | Binding sites for vRNA8 <sup>c</sup> | Probe sequence <sup>d</sup> | Strength of probe binding <sup>e</sup> |            | $\Delta G^{\circ}_{37}$ of duplex for complementary binding site <sup>f</sup> (kcal/mol)           | Nucleotide of RNA target complementary to 3'g of hexamer probe | $\Delta G^{\circ}_{37}$ of duplex for possible mismatched sites <sup>f,g</sup> (kcal/mol)                                |
|-------------------------|--------------------------------------|-----------------------------|----------------------------------------|------------|----------------------------------------------------------------------------------------------------|----------------------------------------------------------------|--------------------------------------------------------------------------------------------------------------------------|
|                         |                                      |                             | vRNA8                                  | mini-vRNA8 |                                                                                                    |                                                                |                                                                                                                          |
| 1p                      | 149 (170, 408, 576, 774)             | dDgDdg                      | 1.000 (S)                              | 0.4391 (S) | -4.4 (-11.37) 149<br>-4.2 (-11.37) 408<br>-2.7 (-9.24) 774<br>-2.3 (-9.24) 170<br>-2.3 (-9.24) 576 | 149C<br>170U<br>408C<br>576U<br>774G                           | -4.5 (-9.34) <b>179</b><br>-4.5 (-9.34) <b>729</b><br>-4.1 (-6.0) <b>69/70</b>                                           |
| 2p                      | 69 (147, 178, 728)                   | GdDgUg                      | 0.7241 (S)                             | -          | -7.6 (-11.17) 69<br>-5.4 (-9.23) 728<br>-5.4 (-10.03) 147<br>-5.3 (-10.03) 178                     | 69C<br>147U<br>178A<br>728G                                    | -4.4 (-9.45) <b>534/535</b>                                                                                              |
| 3p                      | 150 (171, 409, 577, 714)             | GdDgDg                      | 0.6299 (S)                             | 0.2180 (M) | -6.9 (-11.76) 714<br>-5.9 (-9.74) 171<br>-5.9 (-9.74) 150<br>-5.9 (-9.74) 577<br>-5.4 (-9.74) 409  | 150U<br>171U<br>409U<br>577U<br>714C                           | -4.2 (-8.53) <b>52</b><br>-4.2 (-8.53) <b>59</b><br>-4.1 (-5.47) <b>69/70</b>                                            |
| 4p                      | 148 (179, 407, 410, 729)             | DgDdGg                      | 0.4967 (S)                             | 0.4877 (S) | -6.4 (-12.19) 407<br>-5.2 (-9.61) 179<br>-5.2 (-9.61) 729<br>-5.1 (-9.61) 410<br>-4.6 (-9.61) 148  | 148A<br>179A<br>407C<br>410U<br>729A                           | -4.7 (-10.08) <b>536/537</b><br>-4.6 (-4.77) <b>69/70</b><br>-4.5 (-4.77) <b>171/172</b><br>-4.5 (-4.77) <b>577/578</b>  |
| 5p                      | 142                                  | dDgDcg                      | 0.4913 (S)                             | 0.1412 (M) | -5.4 (-9.58) 142                                                                                   | 142U                                                           |                                                                                                                          |
| 6p                      | 52 (59, 713, 719)                    | dDgDgg                      | 0.4837 (S)                             | 0.8894 (S) | -7.0 (-12.96) 719<br>-6.5 (-12.96) 713<br>-5.1 (-10.03) 59<br>-5.0 (-10.03) 52                     | 52G<br>59U<br>713C<br>719C                                     | -4.6 (-10.03) <b>267/268</b><br>-4.2 (-8.52) <b>729</b><br>-4.2 (-8.52) <b>179</b><br>4.1 (-10.55) <b>148/149</b>        |
| 7p                      | 106 (123, 269, 412)                  | dCdGdg                      | 0.4772 (S)                             | 0.3867 (S) | -7.1 (-11.96) 269<br>-5.4 (-9.83) 123<br>-5.4 (-9.83) 412<br>-4.6 (-9.83) 106                      | 106A<br>123U<br>269C<br>412U                                   | -4.1 (-5.96) <b>538/539</b><br>-4.1 (-5.96) <b>180/181</b><br>-4.1 (-5.96) <b>730/731</b><br>-4.1 (-5.96) <b>211/212</b> |
| 8p                      | 163                                  | dDgGug                      | 0.4470 (S)                             | 0.1264 (M) | -7.0 (-12.07) 163                                                                                  | 163C                                                           |                                                                                                                          |
| 9p                      | 68 (534)                             | dDgUgg                      | 0.4449 (S)                             | 0.787 (S)  | -6.3 (-12.37) 534<br>-6.2 (-12.37) 68                                                              | 68C<br>534C                                                    |                                                                                                                          |

|     |                                    |        |            |            |                                                                                                                                           |                                                      |                                                                                                                                                                           |
|-----|------------------------------------|--------|------------|------------|-------------------------------------------------------------------------------------------------------------------------------------------|------------------------------------------------------|---------------------------------------------------------------------------------------------------------------------------------------------------------------------------|
| 10p | 107 (117, 250, 683)                | dDcDgg | 0.2661 (M) | 0.1429 (M) | -4.4 (-9.15) 250<br>-4.4 (-9.15) 107<br>-4.2 (-9.15) 683<br>-4.2 (-9.15) 117                                                              | 107U<br>117G<br>250A<br>683G                         | -4.3 (-5.62) <b>412/413</b><br>-4.2 (-5.62) <b>269/270</b><br>-4.2 (-5.62) <b>123/124</b>                                                                                 |
| 11p | 194 (254, 390)                     | GdGdDg | 0.2659 (M) | -          | -5.7 (-9.5) 194<br>-5.0 (-9.5) 390<br>-5.0 (-9.5) 254                                                                                     | 194G<br>254U<br>390U                                 | -4.8 (-9.8) <b>148/149</b><br>-4.6 (-8.29) <b>729</b><br>-4.6 (-8.29) <b>179</b><br>-4.6 (-9.8) <b>407/408</b><br>-4.3(-6.39) <b>57/58</b><br>-4.3 (-6.39) <b>266/267</b> |
| 12p | 58 (267)                           | dGdGdg | 0.2393 (M) | 0.3886 (S) | -5.4 (-10.71) 267<br>-4.8 (-10.71) 58                                                                                                     | 58A<br>267A                                          | -5.1 (-10.38) <b>536/537</b><br>-5.0 (-6.39) <b>194/195</b><br>-4.8 (-8.3) <b>719</b><br>-4.3 (-7.89) <b>390/391</b><br>-4.4 (-6.39) <b>254/255</b>                       |
| 13p | 17 (118, 251, 684, 854)            | dDdcDg | 0.2387 (M) | 0.1989 (M) | -4.2 (-10.49) 251<br>-3.9 (-10.49) 684<br>-3.9 (-10.49) 118<br>-1.8 (-8.47) 17<br>-1.8 (-8.47) 854                                        | 17G<br>118C<br>251C<br>684C<br>854A                  | -3.5 (-8.46) <b>107</b>                                                                                                                                                   |
| 14p | 121 (169, 210, 253, 389, 537, 575) | dGdDdg | 0.2302 (M) | 0.2805 (M) | -5.0 (-11.13) 537<br>-2.9 (-9.00) 121<br>-2.7 (-9.00) 210<br>-2.1 (-9.00) 253<br>-2.1 (-9.00) 169<br>-2.1 (-9.00) 389<br>-2.1 (-9.00) 575 | 121U<br>169A<br>210A<br>253G<br>389A<br>537C<br>575A |                                                                                                                                                                           |
| 15p | 80 (275)                           | dDcUag | 0.2241 (M) | -          | -2.9 (-7.89) 80<br>-2.3 (-7.89) 275                                                                                                       | 80G<br>275A                                          |                                                                                                                                                                           |
| 16p | 141                                | dGdCdg | 0.2072 (M) | 0.1543 (M) | -4.6 (-9.83) 141                                                                                                                          | 141A                                                 | -4.3 (-9.50) <b>250/251</b><br>-4.0 (-9.50) <b>117/118</b><br>-4.0 (-9.50) <b>683/684</b>                                                                                 |
| 17p | 60 (775)                           | cDdGdg | 0.1966 (M) | 0.5904 (S) | -6.0 (-11.62) 60<br>-5.2 (-9.49) 775                                                                                                      | 60C<br>775U                                          | -4.0 (-9.10) <b>719</b>                                                                                                                                                   |
| 18p | 13 (436)                           | AcCcUg | 0.1905 (M) | -          | -7.6 (-10.18) 13<br>-7.1 (-10.18) 436                                                                                                     | 13A<br>436U                                          |                                                                                                                                                                           |

|     |                               |        |            |            |                                                                                                                         |                                              |                                                                                                                                                                                                                                                                     |
|-----|-------------------------------|--------|------------|------------|-------------------------------------------------------------------------------------------------------------------------|----------------------------------------------|---------------------------------------------------------------------------------------------------------------------------------------------------------------------------------------------------------------------------------------------------------------------|
| 19p | 122 (180, 211, 411, 538, 730) | CdGdDg | 0.1614 (M) | 0.1508 (M) | -7.1 (-11.09) 180<br>-7.1 (-11.09) 730<br>-6.2 (-11.09) 411<br>-5.0 (-9.07) 211<br>-4.5 (-9.07) 122<br>-4.3 (-9.07) 538 | 122U<br>180C<br>211U<br>411C<br>538U<br>730C | -4.0 (-8.29) <b>148</b>                                                                                                                                                                                                                                             |
| 20p | 405                           | dDgGdg | 0.1302 (M) | -          | -6.5 (-12.72) 405                                                                                                       | 405C                                         | -4.0 (-8.47) <b>729</b><br>-4.0 (-8.47) <b>179</b>                                                                                                                                                                                                                  |
| 21p | 535                           | dDdGug | 0.1254 (M) | -          | -4.0 (-10.48) 535                                                                                                       | 535C                                         | -3,7 (-8.45) <b>68</b>                                                                                                                                                                                                                                              |
| 22p | 268                           | CdGdGg | 0.1239 (M) | -          | -6.7 (-9.86) 268                                                                                                        | 268U                                         | -6.8 (-10.33) <b>179/180</b><br>-6.8 (-10.33) <b>729/730</b><br>-5.9 (-10.33) <b>410/411</b><br>-4.7 (-7.08) <b>211</b><br>-4.2 (-7.08) <b>122</b><br>-4.1 (-5.56) <b>58/59</b><br>-4.0 (-5.96) <b>538</b><br>-3.7 (-7.53) <b>148</b><br>-3.6 (-5.1) <b>163/164</b> |
| 23p | 108 (192)                     | GDdCdg | 0.1126 (M) | -          | -7.4 (-10.64) 108<br>-5.2 (-8.51) 192                                                                                   | 108C<br>192U                                 | -4.6 (-8.92) <b>250/251</b><br>-4.3 (-8.92) <b>683/684</b><br>-4.3 (-8.92) <b>117/118</b>                                                                                                                                                                           |
| 24p | 53 (143, 720)                 | uDdGdg | -          | 1.000 (S)  | -5.3 (-10.91) 720<br>-4.5 (-10.91) 53<br>-2.9 (-8.78) 143                                                               | 53C<br>143G                                  | -4.5 (-10.91) <b>59/60</b>                                                                                                                                                                                                                                          |
| 25p | 61 (91)                       | GcDdGg | -          | 0.1904 (M) | -7.5 (-9.87) 91<br>-7.1 (-9.87) 61                                                                                      | 61U<br>91G                                   |                                                                                                                                                                                                                                                                     |
| 26p | 62 (873)                      | DgCdDg | -          | 0.2114 (M) | -6.2 (-11.89) 62<br>-4.5 (-9.87) 873                                                                                    | 62C<br>873U                                  |                                                                                                                                                                                                                                                                     |
| 27p | 63 (874)                      | GdGCdg | -          | 0.1555 (M) | -7.2 (-10.44) 63<br>-6.2 (-10.44) 874                                                                                   | 63U<br>874U                                  | -7.4 (-10.17) <b>107/108</b>                                                                                                                                                                                                                                        |
| 28p | 66                            | GUgGdg | -          | 0.3200 (M) | -9.4 (-12.52) 66                                                                                                        | 66C                                          | -5.0 (-7.27) <b>847</b>                                                                                                                                                                                                                                             |

|     |      |        |   |            |                    |      |                                                                                                                                                 |
|-----|------|--------|---|------------|--------------------|------|-------------------------------------------------------------------------------------------------------------------------------------------------|
| 29p | 716  | DgGdDg | - | 0.1506 (M) | -6.4 (-12.19) 716  | 716C | -4.1 (-9.78) <b>148/149</b><br>-4.1 (-7.48) <b>729</b>                                                                                          |
| 30p | 736  | CGdGdg | - | 0.2762 (M) | -6.8 (-10.24) 736  | 736A | -5.7 (-12.37) <b>59/60</b><br>-4.4 (-9.10) <b>719</b><br>-4.3 (-6.17) <b>52</b>                                                                 |
| 31p | 847  | dUgGdg | - | 0.3015 (M) | -4.7 (-10.46) 847  | 847A |                                                                                                                                                 |
| 32p | 868  | dDgCdg | - | 0.1824 (M) | -6.4 (-12.42) 868  | 868C | -4.2 (-9.11) <b>62</b><br>-4.2 (-6.76) 873/ <b>874</b><br>-3.9 (-7.59) <b>117/118</b><br>-3.5 (-7.69) <b>107</b><br>-3.2 (-5.39) <b>123/124</b> |
| 33p | 181* | CCdGdg | - | 0.1133 (M) | -7.6 (-10.27) 181* | 181U | -4.5 (-5.96) <b>730/731</b><br>-3.8 (-7.46) <b>122</b><br>-3.8 (-5.96) <b>105/106</b>                                                           |

*a* – All sites mapped by microarray mapping are marked on Figure S3; binding sites of probes are denoted by the middle nucleotide of the complementary RNA region (or two nucleotides for probes with an even number of nucleotides); *b* – probes 1p-23p bind vRNA8 and part of them mini-vRNA8, probes 24p-33p bind only mini-vRNA8; *c* - in parenthesis are other fully complementary binding sites for the probe; sites in *italic* do not exist in mini-vRNA8; *d* - nucleotides in capital letter (A, C, G, U, D) are 2'-O-methyl-RNA nucleotides, in small letter (a, c, g, u, d) are LNA nucleotides, D and d are 2,6-diaminopurine (2'-O-methyl type or LNA, respectively); *e* - value:  $0.33 \leq$  strong (S),  $0.11 \leq$  medium (M)  $< 0.33$  and no binding (-)  $< 0.11$ . Condition: buffer A (300 mM NaCl, 5 mM MgCl<sub>2</sub>, 50 mM HEPES, pH 7.5), 37°C; *f* - calculated in RNAstructure program as RNA/RNA duplex and (in parenthesis) calculated considered modification of probe as modified probe/RNA duplex [1,2] the last number is the site of binding for which calculation was done; *g* - bolded are complementary sites of probe which binds strongly or moderately; \*- only mini-vRNA8 site.



**Table G. Deduced strong and medium binding sites in mini-vRNA8 for microarray probes.**

| Probable binding sites <sup>a</sup> | Probe sequence <sup>b</sup> | Predicted $\Delta G^{\circ}_{37}$ of probe/vRNA8 duplex <sup>c</sup> (kcal/mol) | Sites of strong RNase H cleavage in vRNA8 <sup>d</sup> | Strength of binding <sup>e</sup> | Deduced sites | Comments                                                                                                       |
|-------------------------------------|-----------------------------|---------------------------------------------------------------------------------|--------------------------------------------------------|----------------------------------|---------------|----------------------------------------------------------------------------------------------------------------|
| 58                                  | dGdGdg                      | -10.71                                                                          | -                                                      | M                                | 58            | No alternative sites                                                                                           |
| 68                                  | dDgUgg                      | -12.37                                                                          | 70                                                     | S                                | 68            | No alternative sites                                                                                           |
| 107 (117)                           | dDcDgg                      | -9.15/ -9.15                                                                    | 117                                                    | M                                | 117           | Strong RNase H cleavage at 117 in vRNA8, which is in the region of similar folding in mini-vRNA8 and vRNA8     |
| 141                                 | dGdCdG                      | -9.83                                                                           | 143-144                                                | M                                | 141           | Strong RNase H cleavage at 143-144 in vRNA8, which is in the region of similar folding in mini-vRNA8 and vRNA8 |
| 142                                 | dDgDcg                      | -9.58                                                                           | 143-144                                                | S                                | 142           | No alternative sites                                                                                           |
| 163                                 | dDgGug                      | -12.07                                                                          | 166-167                                                | M                                | 163           | No alternative sites                                                                                           |
| 847                                 | dUgGdg                      | -10.46                                                                          | -                                                      | M                                | 847           | No alternative sites                                                                                           |

*a* - binding sites are denoted by the middle nucleotide of the complementary sequence of the target; *b* - nucleotides in capital letter (A, C, G, U, D) are 2'-O-methyl-RNA nucleotides, in small letter (a, c, g, u, d) - LNA nucleotides; D and d - 2,6-diaminopurine (2'-O-methyl type or LNA, respectively); *c*-  $\Delta G^{\circ}_{37}$  calculated as modified probe/RNA duplex [1,2]; *d* - vRNA8 nucleotide preceding RNase H cleavage. Cleavage within 3 nucleotides of probe site was considered confirmation of probe site, “-“ – not tested; *e* – symbols: S – strong binding, M – medium binding.

## References

1. Pasternak A, Kierzek E, Pasternak K, Fraczak A, Turner DH, and Kierzek R. The thermodynamics of 3'-terminal pyrene and guanosine for the design of isoenergetic 2'-O-methyl-RNA-LNA chimeric oligonucleotide probes of RNA structure. *Biochemistry* 2008;47: 1249-1258.
2. Kierzek E, Ciesielska A, Pasternak K, Mathews DH, Turner DH and Kierzek R. The influence of locked nucleic acid residues on the thermodynamic properties of 2'-O-methyl RNA/RNA heteroduplexes. *Nucleic Acids Res.* 2005; 33: 5082-5093.
