# Supplementary material for: Self-Folding of Naked Segment 8 Genomic RNA of Influenza A Virus
Source: PubMed Central journal article supplement (PMC4743857; doi:10.1371/journal.pone.0148281), 2016-02-05
Supplement: pone.0148281.s004.pdf [file pone.0148281.s004.pdf]

**S2 File. Supporting Information Figures.**

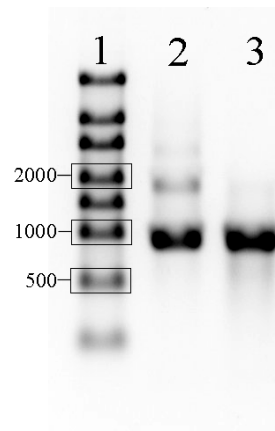

**Fig A. vRNA8 analysis by agarose gel electrophoresis.** 1) RNA Ladder - RiboRuler High Range RNA Ladder – bands in boxes with numbers refer to RNA length; 2) vRNA8 without folding – the homodimeru is present; 3) vRNA8 after folding in buffer (300mM NaCl, 5mM MgCl<sub>2</sub>, 50mM HEPES pH 7.5) (see Materials and methods).

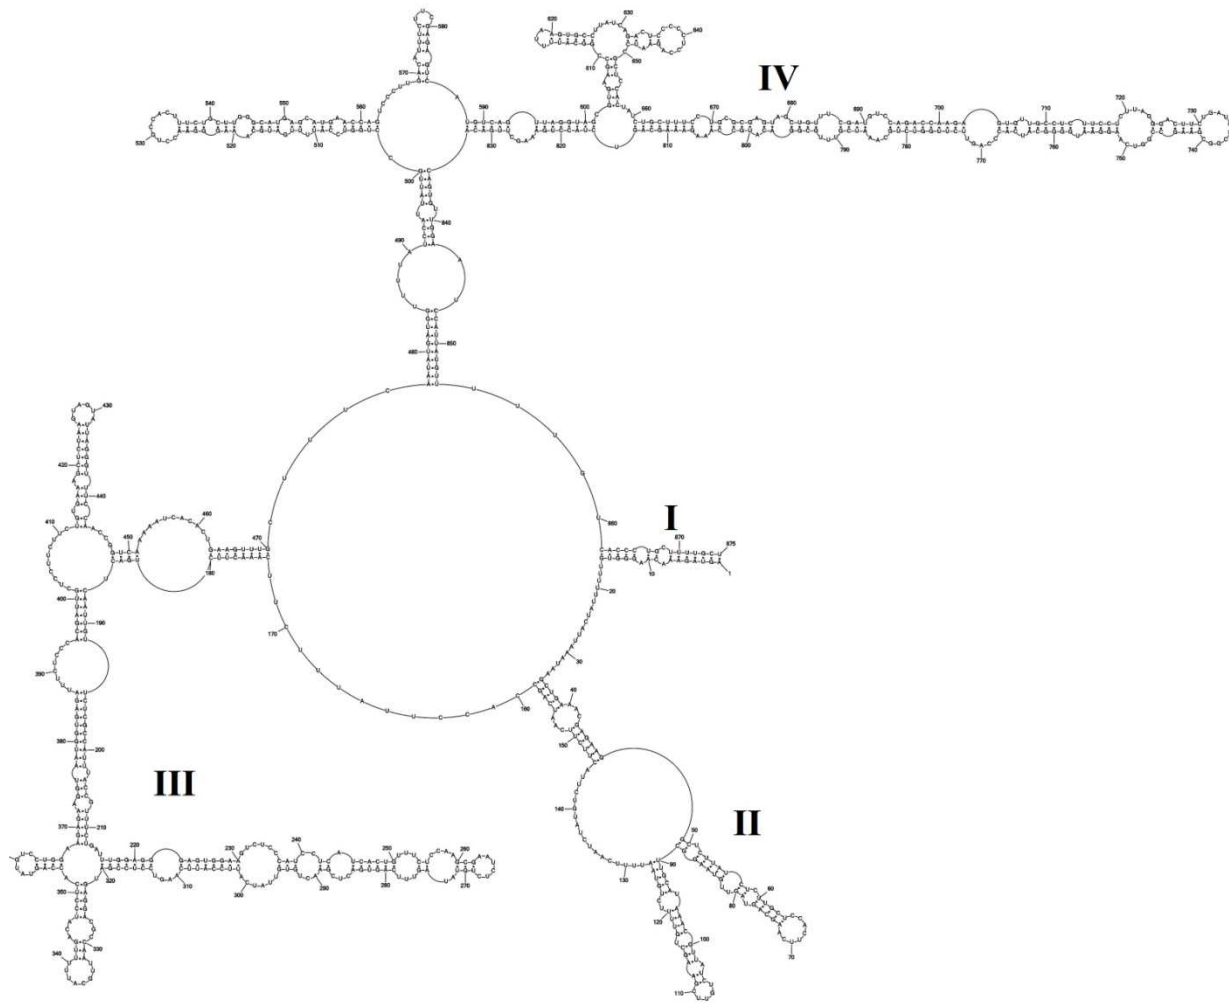

**Fig B. Self-folding vRNA8 predicted by RNAstructure 5.3 without any constraints. The numbering of vRNA8 is from its 5' end.**
